# Supplementary material
Source: PubMed Central journal article supplement (PMC3993601)
Supplement: MCB.01327-13_zmb999100401so9.pdf [file MCB.01327-13_zmb999100401so9.pdf]

1 **Movie Legends**

2

3 **Movie 1. First example for 3D view of IM and IMATs in a wild-type MEF**

4 3D-view of the IM profile of Fig. 5A is shown as a movie rotating horizontally.

5

6 **Movie 2. Connection between IMAT and IM or ER**

7 This movie is related to Fig. 5C. Four tubular elements of IMATs (green) are extracted

8 from the Fig. 5B for generating 3D-model. Note that two tubules are connected with

9 IM (light blue) or ER (yellow).

10

11 **Movie 3. Inside continuity between IMATs and IM or ER**

12 This movie is related to Fig. 5D and E. The boxed region (yellow) in Fig 5A is

13 selected for the movie, in which x-y image moves along the z-axis. Note that spaces

14 inside the two tubular elements (IMATs) are continuous with IM (red arrowheads) or

15 ER (blue arrowheads).

16

17 **Movie 4. Second example for 3D-view of IM and IMATs in a wild-type MEF**

18 3D-view of the IM profile of Fig. 5F is shown as a movie rotating horizontally and

19 vertically.

20

21 **Movie 5. Z-stacked movie of the boxed region in Fig. 5F**

22 The boxed region (yellow) in Fig 5F is selected for the movie, in which x-y image

23 moves along the z-axis.

24

25 **Movie 6. Positional relations between IMAT, IM and ER**

26 The boxed region (yellow) in Fig 5F is selected for the 3D-model, which are rotating  
27 horizontally and vertically. Structures are colored as below: IMATs, green; IMs, blue;  
28 ER, yellow.

29

30 **Movie 7. Inside continuity between IMATs and IM**

31 This movie is related to Fig. 5H. The region “H” in Fig. 5G is selected for the movie,  
32 in which xy-image moves along the z-axis. Note that spaces inside the two tubular  
33 elements (IMATs; green arrowheads) are continuous with IM (blue arrowheads).

34

35 **Movie 8. Inside continuity between IMATs and ER**

36 This movie is related to Fig. 5I. The region “I” in Fig. 5G is selected for the movie, in  
37 which xy-image moves along the z-axis. Note that spaces inside the two tubular  
38 elements (IMATs; green arrowheads) are continuous with ER (yellow arrow).
